1 **Molecular changes in *Mesembryanthemum crystallinum* guard cells underlying the C<sub>3</sub> to**  
2 **CAM transition**

3

4 **Wenwen Kong<sup>1,2,3\*</sup>, Mi-Jeong Yoo<sup>2\*</sup>, Jerald D. Noble<sup>4,5</sup>, Theresa M Kelley<sup>2,5</sup>, Jing Li<sup>1</sup>,**  
5 **Matias Kirst<sup>4,5</sup>, Sarah M. Assmann<sup>6</sup>, Sixue Chen<sup>2,5,7</sup>**

6

7 <sup>1</sup> College of Life Sciences, Northeast Agricultural University, Harbin, China;

8 <sup>2</sup> Department of Biology, University of Florida (UF), Gainesville, FL, USA;

9 <sup>3</sup> Guangdong Province Key Laboratory for Plant Epigenetics, College of Life Science and  
10 Oceanography, Shenzhen University, 518060 Shenzhen, China;

11 <sup>4</sup> School of Forest Resources and Conservation, University of Florida, Gainesville, FL, USA;

12 <sup>5</sup> Genetics Institute, University of Florida, Gainesville, FL, USA;

13 <sup>6</sup> Department of Biology, Pennsylvania State University, University Park, Pennsylvania, USA;

14 <sup>7</sup> Interdisciplinary Center for Biotechnology Research, UF, Gainesville, FL, USA

15

16 \*Equal contribution

17

18 Short running title: **C3 to CAM transition of ice plant guard cells**

19

20 Correspondence:

21 Professor Matias Kirst, e-mail: [mkirst@ufl.edu](mailto:mkirst@ufl.edu)

22 Professor Sarah M. Assmann, e-mail: [sma3@psu.edu](mailto:sma3@psu.edu)

23 Professor Sixue Chen (lead contact), e-mail: [schen@ufl.edu](mailto:schen@ufl.edu)

24 **ABSTRACT**

25 Crassulacean acid metabolism (CAM) is a specialized type of photosynthesis: stomata close  
26 during the day, enhancing water conservation, and open at night, allowing CO<sub>2</sub> uptake.  
27 *Mesembryanthemum crystallinum* (common ice plant) is a facultative CAM species that can shift  
28 from C<sub>3</sub> photosynthesis to CAM under salt or drought stresses. However, the molecular  
29 mechanisms underlying the stress induced transition from C<sub>3</sub> to CAM remain unknown. Here we  
30 determined the transition time from C<sub>3</sub> to CAM in *M. crystallinum* under salt stress. In parallel,  
31 single-cell-type transcriptomic profiling by 3'-mRNA sequencing was conducted in guard cells  
32 to determine the molecular changes in this key cell type during the transition. In total, 495  
33 transcripts showed differential expression between control and salt-treated samples during the  
34 transition, including 285 known guard cell genes, seven CAM-related genes, 18 transcription  
35 factors, and 185 other genes previously not found to be expressed in guard cells. *PEPCI* and  
36 *PPCK1*, which encode key enzymes of CAM photosynthesis, were up-regulated in guard cells  
37 after seven days of salt treatment, indicating that guard cells themselves can transition from C<sub>3</sub> to  
38 CAM. This study provides important information towards introducing CAM stomatal behavior  
39 into C<sub>3</sub> crops to enhance water use efficiency.

40

41 **Keywords:** common ice plant, guard cell, water use efficiency, salt stress, C<sub>3</sub> to CAM transition

42

43 **Summary statement**

44 We determined the timing of salt induced transition of common ice plant from C<sub>3</sub> to CAM and  
45 identified transcriptomic changes during the transition. The data support the notion that guard  
46 cells themselves can transition from C<sub>3</sub> to CAM.

47 **1. INTRODUCTION**

48 Global climate change is causing an increase in frequency of extreme drought and heat events  
49 and reducing fresh water and arable land for agriculture (Kaushal *et al.* 2017; Ziska *et al.* 2016).  
50 The impacts of extreme weather and drought are exacerbated by the demands of a growing  
51 human population, predicted to reach nine billion by 2050 (Borland *et al.* 2014). Therefore,  
52 improving the water-use efficiency (WUE) of agricultural crops is crucial to sustain productivity  
53 under increasing abiotic stresses and to expand cultivation to marginal lands, thereby enhancing  
54 food security.

55  
56 In crassulacean acid metabolism (CAM), a specialized type of photosynthesis, stomata close  
57 during the day and open at night. CO<sub>2</sub> is taken up at night and phosphoenolpyruvate (PEP) is  
58 converted to oxaloacetate by phosphoenolpyruvate carboxylase (PEPC). Oxaloacetate can be  
59 subsequently transformed into malate by malate dehydrogenase and transported into the vacuole.  
60 During the day, the organic acids are exported from the vacuoles and decarboxylated to produce  
61 PEP or pyruvate and release CO<sub>2</sub> for light-driven carboxylation via ribulose-1,5-bisphosphate  
62 carboxylase/oxygenase (Rubisco) in the Calvin cycle (Owen & Griffiths 2013). The PEP is  
63 recycled as the substrate to assimilate CO<sub>2</sub> during the night or used for synthesis of  
64 carbohydrates (Borland *et al.* 2014). By shifting atmospheric CO<sub>2</sub> uptake to nighttime, when  
65 evapotranspiration rates are drastically reduced compared to the day, CAM plants achieve 3- to  
66 6-times higher WUE than C<sub>4</sub> and C<sub>3</sub> plants (Nobel 1996). Therefore, introducing CAM into C<sub>3</sub>  
67 crops could greatly improve WUE and drought tolerance of C<sub>3</sub> plants.

68

69 *Mesembryanthemum crystallinum* (common ice plant) is a facultative CAM plant – it can shift  
70 between C<sub>3</sub> and CAM. When *M. crystallinum* is grown under non-stress conditions, it can  
71 complete its life cycle solely with C<sub>3</sub> photosynthesis (Adams *et al.* 1998). However, under stress  
72 conditions, such as water-deficit, salinity or high light, *M. crystallinum* can perform all the  
73 physiological features of CAM (Winter & Holtum 2005; Winter & Ziegler 1992). The shift from  
74 C<sub>3</sub> to CAM in *M. crystallinum* may be mediated by a calcium-dependent signaling pathway.  
75 Pretreating leaves with a calcium chelator (ethyleneglycol-bis(aminoethyl ether)-N,N-tetraacetic  
76 acid) inhibits stress-induced transcription of *PEPC1*, NAD-glyceraldehyde-3-phosphate  
77 dehydrogenase gene 1 (*GapC1*) and cytosolic NAD-malate dehydrogenase gene 1 (*Mdh1*), which  
78 are all important for CAM (Taybi & Cushman 1999). In addition, increased activity of the  
79 antioxidative stress system (e.g., superoxide dismutase) caused by salinity and high irradiance  
80 (Hurst *et al.* 2004), or H<sub>2</sub>O<sub>2</sub> applied to *M. crystallinum* roots (Surowka *et al.* 2016), can also  
81 induce the C<sub>3</sub> to CAM transition. The inducibility of CAM and the biochemistry of C<sub>3</sub> and CAM  
82 in the same cells (unlike C<sub>4</sub> photosynthesis) make *M. crystallinum* an excellent system to study  
83 the mechanisms underlying the C<sub>3</sub> to CAM transition.

84

85 Previous studies have revealed omics level changes in *M. crystallinum* in response to salt stress  
86 treatment. The first microarray study by Cushman *et al.* (2008) used five-week-old plants (as C<sub>3</sub>),  
87 and plants plus 14 days of salt stress (as CAM). A total of 1457 genes showed more than two-  
88 fold changes in mRNA steady-state levels between control (C<sub>3</sub>) and salt treatment (CAM). Many  
89 of the differentially regulated genes are involved in CAM-related C<sub>4</sub> acid carboxylation/  
90 decarboxylation, glycolysis/gluconeogenesis, starch metabolism, protein degradation,  
91 transcriptional activation, signaling, stress response, and transport (Cushman *et al.* 2008). Using

92 next-generation sequencing, Tsukagoshi and co-workers (2015) identified 53,516 cDNA contigs  
93 from *M. crystallinum* roots and provided a transcriptome database (Tsukagoshi *et al.* 2015). They  
94 found that ABA responsive genes, a sodium transporter (*HKT1*), and peroxidase genes exhibited  
95 opposite responses to 140 mM NaCl treatment in *Arabidopsis* (C3) and ice plant (CAM)  
96 (Tsukagoshi *et al.* 2015). Oh and co-workers (2015) constructed a reference transcriptome  
97 containing 37,341 transcripts from control and salt-treated epidermal bladder cells (EBCs) of *M.*  
98 *crystallinum*, and 7% of the transcripts related to ion transport and signaling were salt stress  
99 responsive. At the small RNA level, Chiang *et al.* (2016) used roots of 3-day-old *M. crystallinum*  
100 seedlings and found 135 conserved miRNAs belonging to 21 families. The expression of mcr-  
101 miR159b and 166b, predicted to target transcription factors such as MYB domain protein 33,  
102 homeobox-leucine zipper family protein (HD-ZIP), and TCP4, were induced by salt treatment  
103 and mcr-miR319 expression was repressed. The proteome, ionome, and metabolome of *M.*  
104 *crystallinum* epidermal bladder cells have also been investigated (Barkla & Estrella 2015; Barkla  
105 *et al.* 2016).

106  
107 The above studies identified numerous candidate genes, miRNAs, proteins and metabolites,  
108 which may inform efforts to improve plant salt tolerance. However, they have focused on either  
109 the steady-state levels of the C<sub>3</sub> and/or CAM photosynthetic modes or the stress tolerance of *M.*  
110 *crystallinum*, not the transition from C<sub>3</sub> to CAM. Therefore, the molecular mechanisms  
111 underlying this stress-induced transition remain unknown. Here we determined the critical  
112 transition time from C<sub>3</sub> to CAM in *M. crystallinum* by measuring several key attributes,  
113 including titratable acidity, stomatal aperture, gas exchange, CAM-related enzyme activity, and  
114 CAM-related gene expression. Since reversed stomatal movement behavior is essential for CAM

115 development, we tested the hypothesis that guard cells themselves undergo transition from C3 to  
116 CAM using single-cell-type transcriptomics.

117

## 118 **2. MATERIALS AND METHODS**

### 119 **2.1. Plant material and growth conditions**

120 *Mesembryanthemum crystallinum* seeds were germinated on vermiculite moistened with 0.5×  
121 Hoagland's solution (Hoagland & Arnon 1950). One-week old seedlings were transferred to 32  
122 ounce containers. The plants were grown in a growth chamber under 200  $\mu\text{mol m}^{-2} \text{s}^{-1}$  white  
123 light with a 12h (26°C) day /12h (18°C) night cycle, and watered daily with 0.5× Hoagland's  
124 solution with micronutrients (50 ml/per plant). Four-week-old plants were treated by irrigating  
125 with 0.5× Hoagland's solution containing 500 mM NaCl, in which the salt was provided as a  
126 source of stress to induce CAM (Cushman *et al.* 2008). Control plants were continuously  
127 watered with 0.5× Hoagland's solution. The third pairs of leaves from the control and salt-treated  
128 plants were collected on day 5, day 6 and day 7 following the initiation of the salt treatment.  
129 Unless stated otherwise, three biological replicates from three different sets of plants were used.

130

### 131 **2.2. Leaf nocturnal acidification**

132 Leaf titratable acidity was measured as previously described (Cushman *et al.* 2008) with minor  
133 modifications. Leaves were harvested from control and salt-treated plants at the end of the night  
134 period (8 am). Fresh weight of the collected leaves was measured, followed by snap freezing in  
135 liquid N<sub>2</sub> and storage at -80°C until analysis. Frozen leaves were ground to a fine powder using a  
136 mortar and pestle, followed by further homogenization in 80% methanol at a ratio of 7.5 ml/gram  
137 of fresh weight at room temperature. The homogenate was allowed to warm to room temperature.

138 Aliquots of the methanol extracts were titrated against 5 mM NaOH to a neutral endpoint (pH =  
139 7.0), using a pH meter. Leaf titratable acidities were expressed as  $\mu\text{mol H}^+ \text{g}^{-1}$  fresh weight.

140

### 141 **2.3. Net CO<sub>2</sub> Exchange**

142 Gas exchange measurements were performed at day 5, day 6 and day 7 of salt treatment. Net  
143 CO<sub>2</sub> uptake was measured using a LI-6800 system (LI-COR Inc., Lincoln, NE, USA), and  
144 parameters were calculated using the manufacturer software. Conditions for measuring net CO<sub>2</sub>  
145 uptake, stomatal conductance, and transpiration rates were: photon flux density 200  $\mu\text{mol m}^{-2} \text{s}^{-1}$ ,  
146 chamber temperature 18°C/night and 26°C/day, flow rate 500  $\mu\text{mol s}^{-1}$ , relative humidity 50%,  
147 and 400 ppm CO<sub>2</sub> reference. The chamber covered approximately 7 cm<sup>2</sup> area of the ice plant leaf  
148 to measure net gas exchange. For each time point at least five plants were used. Rates of net CO<sub>2</sub>  
149 uptake, stomatal conductance, and transpiration were retrieved from the LI-6800 data.

150

### 151 **2.4. Stomatal aperture assay**

152 The epidermis of control and salt-treated plant leaves were removed using 10 cm wide tape at 4  
153 am and 4 pm, during the CAM transition process. After peeling, minor contamination from  
154 adhering mesophyll cells was removed by scratching the epidermis using a scalpel blade, and  
155 clean peels were directly used for imaging stomatal apertures. For stomatal aperture  
156 measurement, 60 - 80 stomata were randomly selected, and the sample identity was blinded  
157 during the measurement. Stomatal length and width were measured as described (Savvides *et al.*  
158 2012), and stomatal aperture was estimated by the length/width ratio.

159

### 160 **2.5. CAM-related gene expression profiling via quantitative real-time PCR**

161 To identify the C<sub>3</sub> to CAM transition time points, we assessed the expression of 28 CAM-related  
162 genes using quantitative real-time PCR (Table S1). Total RNA was isolated from leaf tissue  
163 using a CTAB method (Doyle & Doyle, 1987), and the quality and quantity were analyzed using  
164 a NanoDrop 1000 spectrophotometer (Thermo Fischer Scientific, San Jose, CA, USA). Five  
165 micrograms of total RNA were treated with RNase-free DNase I (New England Biolabs, Ipswich,  
166 MA, USA) to remove genomic DNA. cDNA was synthesized using a ProtoScript<sup>®</sup> First Strand  
167 cDNA Synthesis Kit (New England Biolabs, Ipswich, MA, USA) according to the  
168 manufacturer's manual. The cDNA was diluted to a final concentration of 50 ng/μl, and 5 μl was  
169 used in a 20 μl PCR reaction with 1 μl of each 10 μM primer and 10 μl of VeriQuest SyBr with  
170 Fluorescein kit (Affymetrix, Santa Clara, CA, USA). For each reaction, three technical replicates  
171 were included for each biological replicate. All amplifications were carried out on a CFX96  
172 Touch<sup>™</sup> Real-Time PCR Detection System (Bio-Rad, Hercules, CA, USA). The product size  
173 was confirmed by 2% agarose gel electrophoresis and the specificity of the amplicon was  
174 confirmed by melting curve analysis. Data were analyzed and quantified with the Bio-Rad CFX  
175 Manager software. The transporter gene *PLASMA MEMBRANE INTRINSIC PROTEIN 1;2*  
176 (*PIP1;2*) was used as an internal PCR standard, as its expression is constant during the diurnal  
177 cycle in leaves from control and salt-treated *M. crystallinum* (Vera-Estrella *et al.* 2012). The  
178 relative expression levels were calculated by the  $2^{-\Delta\Delta C_T}$  method (Livak & Schmittgen 2001).

179

## 180 **2.6. PEPC enzyme activity**

181 For PEPC enzyme activity assays, 50 mg frozen leaf tissue was ground in liquid nitrogen to a  
182 fine powder, and extracted with 0.5 ml enzyme extraction buffer (200 mM HEPES-NaOH (pH  
183 7.0), 5 mM dithiothreitol (DTT), 10 mM MgCl<sub>2</sub> and 2% (w/v) PVP-40). The homogenized



184 mixture was then centrifuged at 14,000 rpm, 4°C for 20 minutes and the supernatant was retained.  
185 To measure the activity of PEPC, 50 µl supernatant, 150 µl extraction buffer and 2.8 ml assay  
186 solution (100 mM HEPES-NaOH (pH 8.0), 5 mM DTT, 5 mM MgCl<sub>2</sub>, 10 mM NaHCO<sub>3</sub>, 2.5  
187 mM phosphoenolpyruvate (PEP), 0.2 mM NADH and 0.0034 units/µl malate dehydrogenase  
188 (MDH)) were used. Absorbance at 340 nm was recorded for at least 5 min. PEPC enzyme  
189 activity was calculated as described previously (Chu *et al.* 1990).

190

## 191 **2.7. Guard cell enrichment and construction of RNA-Seq libraries**

192 For guard cell enrichment, parallel samples from control and salt-treated plants were collected at  
193 12 am and 12 pm from day 5 to day 7 using a tape-peel method (Lawrence *et al.* 2018). Briefly,  
194 the abaxial epidermis was directly peeled off using Scotch Transparent tape, and adherent  
195 mesophyll cells were removed from the epidermis with a scalpel. After washing in basic solution  
196 (0.55 M sorbitol, 0.5 mM CaCl<sub>2</sub>, 0.5 mM MgCl<sub>2</sub>, 0.5 mM ascorbic acid, 10 µM KH<sub>2</sub>PO<sub>4</sub>, 5 mM  
197 4-morpholineethanesulfonic acid (MES), pH 5.5 adjusted with 1 M KOH), the tapes with  
198 adherent epidermis were incubated with a cell wall digesting enzyme solution (0.7% cellulase R-  
199 10 (Yakult Honsha Co., Ltd, Tokyo, Japan), 0.025% macerozyme R-10 (Yakult Honsha Co., Ltd,  
200 Tokyo, Japan), 0.1% (w/v) polyvinylpyrrolidone-40 (Calbiochem, Billerica, Massachusetts,  
201 USA), and 0.25% (w/v) bovine serum albumin (Research Products International Corp., Mt  
202 Prospect, Illinois, USA) in 55% basic solution on a reciprocal shaker for 30 min at room  
203 temperature. Digested peels were washed three times with basic solution and quickly blotted dry  
204 on a filter paper, then immediately frozen in liquid nitrogen and stored at -80°C until RNA  
205 extraction. For each time point, three independent biological replicates were collected using three  
206 different sets of 120 plants. Total RNA was isolated using a CTAB method (Doyle & Doyle,

207 1987). After eliminating any genomic DNA contamination with RNase-free DNase I (New  
208 England Biolabs, Ipswich, MA, USA), mRNA was purified using a Dynabeads<sup>®</sup> mRNA  
209 Purification Kit (Thermo Fischer Scientific, San Jose, CA, USA). RNA-seq libraries were  
210 constructed using the QuantSeq 3' mRNA-Seq Library Prep Kit (Lexogen, Vienna, Austria)  
211 according to the manufacturer's instructions. RNA sequencing was performed on an Illumina  
212 NextSeq 500 with 75 bp single end reads at the NextGen DNA Sequencing Core of the  
213 University of Florida, Gainesville, FL.

214

## 215 **2.8. RNA-Seq data analysis**

216 For gene expression quantification, a reference transcriptome was constructed using sequences  
217 from ice plant bladder cell ([www.lslugenomics.org/data-from-our-group](http://www.lslugenomics.org/data-from-our-group)) (Oh *et al.* 2015) and  
218 root ([dandelion.liveholonics.com/pothos/Mcr/data/reference/Mcr.transcript.fasta](http://dandelion.liveholonics.com/pothos/Mcr/data/reference/Mcr.transcript.fasta)) (Tsukagoshi *et*  
219 *al.* 2015), sequences downloaded from NCBI, and Expressed Sequence Tags (ESTs) previously  
220 published (Cushman *et al.* 2008). Sequences from each reference were concatenated into a single  
221 fasta file to serve as a reference transcriptome. Because the *de novo* assemblies and transcripts  
222 were accessed from multiple sources, it was not known which transcripts were identical, or  
223 alternatively spliced isoforms, due to lack of a reference ice plant genome. To address the  
224 redundancy of the sequences in the reference and to collapse putative isoforms into a single  
225 transcript, Cap3 (Huang & Madan 1999) was used with default parameters (-a 20 -b 20 -c 12 -d  
226 200 -e 30 -f 20 -g 6 -h 20 -i 40 -j 80 -k 1 -m 2 -n -5 -o 40 -p 90 -r 1 -s 900 -t 300 -u 3 -v 2  
227 -w NA -x cap -y 100 -z 3). Assembled contigs representing putative collapsed transcript  
228 isoforms and singlet transcripts that were not homologous to other transcripts were kept as  
229 transcript references for alignments. These transcripts represent putative gene sequences. To

230 exclude multiple isoforms of the same gene, the single longest contig was used for each gene. A  
231 single transcript representing each gene was used because downstream analysis of differential  
232 transcript expression was conducted at the gene level rather than the isoform level, as 3' end  
233 sequencing or short read sequencing in general is not suitable for isoform level quantification.  
234 Low quality bases/reads were removed from the sequence data with Trimmomatic (Bolger *et al.*  
235 2014) with parameters HEADCROP:0 LEADING:3 TRAILING:3 SLIDING-WINDOW:4:20  
236 MINLEN:18. Reads were mapped to our reference transcriptome with RSEM (Li & Dewey 2011)  
237 version 1.2.31. Gene expression was measured as the number of reads that aligned to a given  
238 transcript (counts). Gene counts for each sample were consolidated into a matrix and imported  
239 into EdgeR (McCarthy *et al.* 2012) to conduct differential expression analysis. Differentially  
240 expressed (DE) transcripts were identified by comparing control versus salt treatment groups or  
241 day versus night groups from day 5, day 6, day 7, night 5, night 6 and night 7 sampling groups  
242 using a 2-fold change and an adjusted *p*-value threshold of 0.05. The RNA-Seq data have been  
243 deposited at the National Center for Biological Information (NCBI) Sequence Read Archive  
244 (SRA) under the accession number SRX3878746.

245

### 246 **3. Results**

#### 247 **3.1. Determination of the C<sub>3</sub> to CAM transition timing**

##### 248 **3.1.1. Titratable acidity**

249 Because of the nocturnal CO<sub>2</sub> assimilation in CAM plants, high levels of malate accumulate in  
250 vacuoles of mesophyll cells before dawn, which increases cellular acidity. Changes of leaf  
251 titratable acidity measured at the start (8 pm) and end (8 am) of the dark period were used as a  
252 measure of CAM induction in *M. crystallinum* from day 4 to day 14 after 500 mM salt treatment.

253 Salt-treated plants, measured from days 21 and 28, were used as positive controls because they  
254 use the CAM mode of photosynthesis only (Cushman *et al.* 2008; Vera-Estrella *et al.* 2012). A  
255 modest increase of overnight acidity was observed on day 6 in leaves of the salt-treated plants.  
256 The difference between treated and control plants became statistically significant on day 7, after  
257 which titratable acidity steadily increased (Figure 1A). It was noteworthy that there were no  
258 visible morphological differences between the control and salt-treated plants at day 7 (Figure 1B).  
259 Based on the nocturnal acid accumulation, we inferred that the C<sub>3</sub> to CAM transition occurred  
260 between days 5 to 7 of salt treatment; thus, we collected samples from day 5 (no transition), day  
261 6 and day 7 plants for follow-up analyses.

262

### 263 **3.1.2. Net CO<sub>2</sub> exchange and stomatal movement**

264 At day 5, control and salt-treated plants showed no difference in gas exchange parameters.  
265 However, day 6 salt-treated plants showed increased net CO<sub>2</sub> uptake in the night and much lower  
266 net CO<sub>2</sub> uptake during the day, compared to control plants (Figure 2A). Salt-treated plants from  
267 day 7 showed decreased net CO<sub>2</sub> uptake during the day and positive net CO<sub>2</sub> uptake in the night,  
268 significantly different from control plants (Figure 2A).

269

270 To further confirm the C<sub>3</sub> to CAM transition time-points, stomatal aperture was measured in the  
271 control and salt-treated plants during the night (at 4 am) and the day (at 4 pm). These two time-  
272 points were chosen based on the result of net CO<sub>2</sub> exchange (Figure 2A). As shown in Figure 2B,  
273 the control plants showed C<sub>3</sub>-type stomatal movement, i.e., they closed stomata during the night  
274 and opened stomata during the day. In contrast, the salt-treated plants showed an inversion in  
275 stomatal movement, starting on day 5. Stomatal aperture of the salt-treated plants increased

276 consistently during the nights of day 6 and day 7 (Figure 2B). The gas exchange and stomatal  
277 movement results also support that the C<sub>3</sub> to CAM transition of *M. crystallinum* occurs between  
278 day 5 to day 7 of the salt treatment.

279

### 280 **3.1.3. CAM-related gene expression profiles**

281 To further validate the C<sub>3</sub> to CAM transition, CAM-related genes were selected for analysis  
282 based on previous studies (Brilhaus *et al.* 2016; Cushman *et al.* 2008; Vera-Estrella *et al.* 2012).

283 In total, 28 genes were selected, including PEP carboxylase (*PEPC*, the enzyme responsible for  
284 dark CO<sub>2</sub> fixation) (Osmond 1978), PEPC kinase (*PPCK1*) (Dittrich 1976), 4-alpha-  
285 glucanotransferase or disproportionating enzyme (*GTF1*, involved in starch degradation)  
286 (Cushman *et al.* 2008), circadian clock associated 1 (*CCA1*) (Abraham *et al.* 2016),  
287 phosphoglycerate kinase (*PGK3*) (Brilhaus *et al.* 2016; Cushman *et al.* 2008), and ABA  
288 insensitive 1 (*ABII*, involved in guard cell movement) (Abraham *et al.* 2016). From day 5 to day  
289 7, control and salt-treated leaves were collected at 2 am and 4 am because two core CAM genes,  
290 *PEPC* and *PPCK1*, were reported to exhibit the highest expression levels at these time-points  
291 (Dodd *et al.* 2002). As shown in Figure 3A, *PEPC* exhibited a > 5-fold increase in transcript  
292 abundance at the two time points of day 6 in salt-treated plants compared to control plants and  
293 kept increasing up to > 200-fold at day 7. *PPCK1* showed a similar expression profile as *PEPC*.  
294 *ABII* and *GTF1* also showed higher transcript abundances at the two time points of day 6 in the  
295 salt-treated plants, and the levels kept increasing at day 7. *ABII* is an important ABA signaling  
296 component. The increased *ABII* transcript abundance may contribute to the development of  
297 CAM (Figure 2B). *CCA1*, a key regulator of circadian rhythm in plants, showed a significant  
298 increase at 4 am of day 7 in salt-treated samples relative to control plants. *PGK3* showed

299 significant decreases at the two time points of day 7 in the salt-treated samples. All six genes  
300 exhibited similar expression patterns at day 7 in the salt-treated plants as those reported in  
301 previous studies (Brilhaus *et al.* 2016; Cushman *et al.* 2008). Most of other 22 genes analyzed  
302 showed similar expression patterns as the above six genes at day 7 in the salt-treated plants  
303 (Table S2).

304

#### 305 **3.1.4. PEPC enzyme activity**

306 PEPC activity in the dark is much higher in CAM plants than in C<sub>3</sub> plants (Chu *et al.* 1990).  
307 PEPC activity changes were measured in the samples collected at 2 am and 4 am of day 5 to day  
308 7. As shown in Figure 3B, PEPC enzyme activity was significantly enhanced at the two day 7  
309 time points in the salt-treated plants, as compared to the control. Taken together, the  
310 physiological data on titratable acidity, CO<sub>2</sub> exchange, PEPC activity and stomatal movement, as  
311 well as the transcription of key CAM-related genes, demonstrate that the transition from C<sub>3</sub> to  
312 CAM photosynthesis occurs between days 5 and 7.

313

#### 314 **3.2 Transcriptomics of *M. crystallinum* guard cells during the C<sub>3</sub> to CAM transition**

315 To investigate the regulatory mechanism(s) underlying the transition to inverse stomatal opening  
316 in *M. crystallinum*, we profiled the single-cell type transcriptome of guard cells using RNA-Seq  
317 during days 5, 6 and 7 at 12 am (night) and 12 pm (day). A total of 197,790,866 raw reads were  
318 acquired. Removal of low quality reads with Trimmomatic (Bolger *et al.* 2014) resulted in  
319 188,147,736 high quality reads. By using previously published microarray and transcriptome  
320 data (Cushman *et al.* 2008; Oh *et al.* 2015; Tsukagoshi *et al.* 2015), we created a reference  
321 transcriptome, to which our short reads were mapped. In total, 43,165 different transcripts

322 (including isoforms) were expressed in *M. crystallinum* guard cells (Counts Per Million (CPM)  $\geq$   
323 10 in at least two biological replicates) (Table 1). Among these transcripts, 10,628 transcripts  
324 were not matched to the reference plant *Arabidopsis thaliana* transcripts (based on BLAST e-  
325 value  $\leq 0.001$ , similarity  $\geq 70$ ).

326

327 Significantly differentially expressed (DE) transcripts were defined as those with at least a 2-fold  
328 difference between control and salt-treated samples and an adjusted  $p$ -value  $< 0.05$ . A total of  
329 495 transcripts showed significant changes at one or more time points by comparing the salt-  
330 treated and control plants; 369 of these DE transcripts have homologs in *Arabidopsis*. Among the  
331 369 DE transcripts, *PEPCI* was found to increase at 12 am (night) of day 7 in the salt-treated  
332 samples (Table 2). This increased expression of *PEPCI* in guard cells correlates with our real-  
333 time PCR result in leaves (Figure 3).

334

335 Gene Ontology (GO) enrichment analysis of the 369 DE transcripts was performed using R  
336 package “clusterProfiler” (DOI: 10.18129/B9.bioc.clusterProfiler). The DE transcripts were  
337 enriched for the category “response to stimulus”, especially “response to abiotic stimulus” and  
338 “response to stress”. In terms of molecular function, the encoded proteins were enriched in  
339 catalytic activity (Figure 4). It is interesting to note that there was little overlap between the DE  
340 transcripts in the day samples (Figure 5A) or night samples (Figure 5B) at days 5, 6 and 7,  
341 suggesting different changes took place in the course of the early stages of transition from  $C_3$  to  
342 CAM. When the DE genes from day and night samples were compared, only about 10% of the  
343 DE genes were shared (Figure 5B). A small number of genes showed opposite change patterns  
344 under the day versus the night conditions (Table S3). For example, a papain-like cysteine

345 protease showed high expression in control samples collected at night in day 5. At days 6 and 7,  
346 its expression levels started to decrease in control night and significantly increase in the day of  
347 salt-treated samples (Table S3). How this cysteine protease play a role in the CAM transition is  
348 not known. Nevertheless, this result suggests that the GC transcriptome is diurnally regulated  
349 during development of CAM (as are stomatal apertures).

350

### 351 **3.3 Abundance changes of previously identified guard cell transcripts during the C<sub>3</sub> to** 352 **CAM transition**

353 To identify the CAM-related DE transcripts in our study, we compared these 369 DE transcripts  
354 with Cushman et al. (2008)'s microarray data, which identified 56 CAM-related genes and non-  
355 CAM isogenes in *M. crystallinum* that displayed maximal inverse expression between CAM-  
356 performing and C<sub>3</sub> leaves. Seven out of the 56 genes were retrieved from our DE transcripts,  
357 including *PEPC1* (comp24500\_c0\_seq1), *PPCK1* (Contig5856), *BETA-AMYLASE 5*  
358 (Contig3509, *AMYB5*), *CARBONIC ANHYDRASE 2* (Contig20069, *CAH2*), *FRUCTOSE-*  
359 *BISPHOSPHATE ALDOLASE 2* (Contig12312, *FBA2*), *PHOSPHOGLYCERATE MUTASE*  
360 (Mcr017048.026, *PGM*) as well as another *PHOSPHOENOLPYRUVATE CARBOXYLASE*  
361 family protein gene (Contig20312) (Table 2). Among these seven genes, only *PPCK1* and  
362 *AMYB5* were not found in previous guard cell studies (Table 2). *PPCK1*, *PEPC1*, as well as  
363 another *PEPC* family gene, were up-regulated in our day 7 night samples, similar to the real-time  
364 PCR result on leaf tissue (Figure 3). The up-regulation of *PGM*, *CAH2*, *FBA2* and *AMYB5* in  
365 guard cells (Table 2) was also found in *M. crystallinum* leaves in a previous study (Cushman et  
366 al., 2008). However, in day 7 samples, *PGM* encoding a phosphoglycerate mutase up-regulated  
367 in leaves of the CAM plants (Cushman et al., 2008), was down-regulated in guard cells (Table 2).



368 Overall, this analysis corroborates that guard cells themselves are transitioning to CAM because  
369 they exhibit many of the transcriptomic changes expected of cells undergoing that process.  
370 Additionally, guard cells also have their own transcriptional program during the transition.

371

### 372 **3.4 Transcription factor changes during the C<sub>3</sub> to CAM transition**

373 It has been reported that in response to internal or external environment changes, transcription  
374 factors (TFs) exhibit more rapid expression changes than the bulk of the regulated genes (Jiao et  
375 al. 2003). Thus, the expression profiles of TF genes may in some way reflect the subsequent  
376 transcription activities regulated by them. In total, 18 TFs were identified among the 369 DE  
377 transcripts, and 14 of them were observed in other guard cell studies (Table 2). Based on the  
378 annotation from the *Arabidopsis* homologs, four TFs (Mcr002150.001, Mcr008625.003,  
379 Contig18172 and Contig9771) were identified in previous studies as responsive to salt or water  
380 deprivation stress in leaves or shoots (Table S4) (Ding et al. 2013; Seo & Park 2011; Yanhui et  
381 al. 2006). Since CAM mode in *M. crystallinum* is induced by abiotic stresses, such as salt and  
382 drought stress, these TFs may be general stress response genes and the others may have  
383 important roles in the C<sub>3</sub> to CAM transition.

384

385 To evaluate how gene expression changes during the transition process, we grouped genes with  
386 similar pattern of expression using k-means clustering. Eleven clusters were retrieved, of which  
387 cluster 5 contained the greatest number of transcripts (Figure 6). In cluster 5, several genes  
388 showed differential expression profiles in the day samples, but the majority of transcripts showed  
389 increases in expression during the day 5 night. Only one gene, *ARGININE/SERINE-RICH*  
390 *SPLICING FACTOR 35* (Mcr012474.005) showed decreased expression during the day 7 night.

391 In cluster 10, 20 of 24 transcripts have *Arabidopsis* homologs, and 17 of them were present in  
392 other guard cell studies (Figure 6). In this cluster, there are no differences in any samples during  
393 the day time, while all of them showed increases during the day 7 night (Figure 6). This cluster  
394 contains two key players in the CAM mode, *PEPC1* and *PPCK1*. It also includes three TFs:  
395 *AGAMOUS-LIKE 8* (AT5G60910), *HOMEODOMAIN 7* (AT2G46680) as well as *BEL1-LIKE*  
396 *HOMEODOMAIN 7* (AT2G16400) (Table 2).

397

## 398 **Discussion**

399 In this study, the C<sub>3</sub> to CAM transition was induced by 500 mM salt treatment, and the transition  
400 time points were supported by several physiological parameters and molecular marker  
401 expression profiles (Figures 1-3). Furthermore, the cell-type specific transcriptome of guard cells  
402 was characterized during the C<sub>3</sub> to CAM transition (Figures 4-6). Results are discussed here in  
403 light of the molecular mechanisms occurring in guard cells during the transition.

404

405 Although there have been many steady-state studies of C<sub>3</sub> and/or CAM (e.g., Cushman *et al.*  
406 2008; Davies & Griffiths 2012; Tsukagoshi *et al.* 2015), determination of the critical transition  
407 time-point was not reported before. The results of this study suggest that the C<sub>3</sub> to CAM  
408 induction in *M. crystallinum* takes place within a short period of time (from day 5 to day 7), but  
409 that the full transition of photosynthesis to CAM is slow (another 2-4 weeks) (Figures 1, 2).  
410 Therefore, to determine the mechanisms underlying the C<sub>3</sub> to CAM transition, we cannot rely on  
411 the analysis of one-time point. For the transcriptomic analysis of guard cells, we targeted six-  
412 time points from day 5 to day 7 of salt treatment.

413

414 We generated a reference transcriptome based on previously sequenced ESTs (Cushman *et al.*  
415 2008), assembled transcripts (Oh *et al.* 2015; Tsukagoshi *et al.* 2015), and individual genes from  
416 *M. crystallinum* reported at NCBI. The genome size of *M. crystallinum* is 390 Mbp (Ha *et al.*  
417 2014), with an estimate of 30,000 to 35,000 genes (De Rocher *et al.* 1990; Meyer *et al.* 1990).  
418 We constructed more than 180 thousand contigs, and identified 40,757 different transcripts  
419 (including isoforms) that were expressed in our samples. Among them, 10,628 unique transcripts  
420 in guard cells (no isoforms) were found to have homologs in Arabidopsis. Based on the previous  
421 studies of Arabidopsis guard cell transcriptomes (Bates *et al.* 2012; Bauer *et al.* 2013; Leonhardt  
422 *et al.* 2004; Pandey *et al.* 2010; Wang *et al.* 2011) and proteome (Zhao *et al.* 2008), about 30%  
423 of guard cell genes of *A. thaliana* had homologs expressed in *M. crystallinum* guard cells under  
424 our salt stress condition. From the RNA-Seq data, we identified 495 DE transcripts that showed  
425 significant changes at one or more time points of transition, of which 369 have homologs in  
426 Arabidopsis. Among these 369 DE transcripts, there were 199 up-regulated and 178 down-  
427 regulated transcripts in response to the salt treatment (Table 1). Both up- and down-regulated  
428 transcripts were enriched in “response to stress” and “cellular carbohydrate metabolic process”,  
429 suggesting a subset of genes involved in the two biological processes was employed in the  
430 course of transition. Key CAM molecular marker genes such as *PPCK1*, *PEPC1* and *GTF1*, as  
431 well as another *PEPC* family gene were up-regulated in the night 7 samples (Table 2, Table S4).  
432 This new observation suggests that guard cells switch from C<sub>3</sub> to CAM; the timing of the  
433 differential expression in guard cells is also consistent with our physiological determination of  
434 the C<sub>3</sub> to CAM transition time points (Figures 1-3). Another four CAM-related genes were also  
435 identified: *PGM*, *CAH2*, *FBA2* and *AMYB5*. Except for *PGM*, the other three genes showed  
436 similar expression profiles to those reported in leaves of CAM *M. crystallinum* (Table 2)

437 (Cushman *et al.* 2008). *PGM*, which encodes a phosphoglycerate mutase was reported to be up-  
438 regulated in the plants performing CAM (Cushman *et al.* 2008), while in our study it was down-  
439 regulated in the day 7 samples. This may be due to difference in materials used since we targeted  
440 guard cells only, while Cushman and co-workers (2008) utilized the whole leaf in their study.  
441 Interestingly, *PGM* was shown to play an important role in guard cell functions. A null *pgm*  
442 mutant displayed defects in blue light-, abscisic acid-, and low CO<sub>2</sub>-regulated stomatal  
443 movements in *Arabidopsis* (Zhao & Assmann 2011). Another difference between our study and  
444 that of Cushman *et al.* (2008) is the time of sample collection: our samples were harvested  
445 during the C<sub>3</sub> to CAM transition, while the previous study used leaves from plants performing  
446 complete CAM photosynthesis (Cushman *et al.* 2008). Therefore, this disparity indicates that the  
447 guard cells regulate transcription differently from those of leaves, either in response to salt stress  
448 or during transition and after transition to the CAM mode.

449  
450 Notably, 18 TFs were identified among the 369 DE transcripts, and 14 of them were also  
451 detected in previous guard cell studies (Table 2). Among these 18 TFs, six of them were down-  
452 regulated, while 12 were up-regulated during the transition compared to the control guard cells  
453 from plants undergoing C<sub>3</sub> photosynthesis. Four TFs (*Mcr002150.001*, *Mcr008625.003*,  
454 *Contig18172*, and *Contig9771*) may be related to salt or water deprivation stress response. These  
455 TFs are key players in the regulatory networks underlying plant responses to abiotic stresses and  
456 development processes (Coelho *et al.* 2018; Gollack *et al.* 2014; Hoang *et al.* 2017). Among  
457 them, *Mcr010456.002* (*At2g42280.1*), which encodes a basic helix-loop-helix (bHLH) TF, was  
458 implicated in stomatal movement through activation of genes encoding inwardly rectifying K<sup>+</sup>  
459 channels (Takahashi *et al.* 2013). In addition, from the *k*-means clustering result (Figure 4), 26

460 DE transcripts (including the two CAM genes, *PEPC1* and *PPCK1*, present in cluster 10) were  
461 up-regulated in samples collected during the night of day 7 (Table S4), suggesting these genes  
462 were induced in the initial CAM guard cells. The significantly changed genes (including TFs)  
463 that are co-regulated with known CAM genes (e.g., *PPCK1* and *PEPC1*) can be expected to play  
464 important roles in the C<sub>3</sub> to CAM transition process. In ice plants performing C<sub>3</sub> photosynthesis,  
465 light increases leaf conductance and also promotes stomatal opening in isolated epidermal peels,  
466 while in plants performing CAM, stomatal opening in epidermal peels becomes unresponsive to  
467 light (Figure S1). This result and the RNA-Seq data from the isolated stomatal guard cells  
468 corroborate previous studies in facultative CAM species (Lee & Assmann 1992; Tallman *et al.*  
469 1997), and demonstrate the presence in the guard cells themselves of molecular switches for the  
470 CAM inverse stomatal behavior, separate from mesophyll cells.

471  
472 In summary, we induced CAM transition from C<sub>3</sub> in *M. crystallinum* by 500 mM NaCl treatment  
473 and successfully determined the timing of the C<sub>3</sub> to CAM transition. Furthermore, we  
474 characterized the guard cell transcriptomic changes during the critical transition process. The  
475 presence and the diel changes of CAM marker genes in stomatal guard cells indicate the guard  
476 cells themselves can transit from C<sub>3</sub> to CAM. Many candidate genes (including TFs) were  
477 identified. Functional studies of these candidate genes in guard cells of either ice plant or the  
478 reference plant *Arabidopsis* are important future directions. In addition, these results indicate that  
479 efforts focused solely on engineering the mesophyll to introduce CAM into other species for  
480 improving WUE and stress tolerance may fail. Engineering both the mesophyll cells and guard  
481 cells is likely to be necessary.

482

483

484 **ACKNOWLEDGMENTS**

485 We thank Christopher Krieg, Emily Sessa, Tianyi Ma, and Zepeng Yin for their help in obtaining  
486 data with the LI-6800, and Christopher Dervinis for his technical assistance in the RNA-Seq  
487 experiments. We also thank Dr. John Cushman from University of Nevada for providing the  
488 *Mesembryanthemum crystallinum* seeds and protocol for growing the plants. This work was  
489 supported by the University of Florida internal funds, with additional partial support from NSF  
490 Plant Genome Research Program Award #1444543, and NSF REU grant # 1560049 for the  
491 support to an undergraduate student Theresa M Kelley for carrying out part of this research.

492

493 **AUTHOR CONTRIBUTIONS**

494 MK, SA and SC designed the research project. WK, MY and TK performed the experiments.  
495 MY and JN analyzed the transcriptomics data. JL helped with data interpretation and manuscript  
496 editing. MK and MY made the figures, and wrote the manuscript draft. All the authors read and  
497 approved the manuscript. SC finalized the manuscript for submission.

498

499

500 **REFERENCES**

501 Abraham P.E., Yin H., Borland A.M., Weighill D., Lim S.D., De Paoli H.C., Engle N., Jones  
502 P.C., Agh R., Weston D.J., Wullschleger S.D., Tschaplinski T., Jacobson D., Cushman  
503 J.C., Hettich R.L., Tuskan G.A. & Yang X. (2016) Transcript, protein and metabolite  
504 temporal dynamics in the CAM plant Agave. *Nature Plants* 2, 16178.

- 505 Adams P., Nelson D.E., Yamada S., Chmara W., Jensen R.G., Bohnert H.J. & Griffiths H. (1998)  
506 Growth and development of *Mesembryanthemum crystallinum* (Aizoaceae). *New*  
507 *Phytologist* 138, 171-190.
- 508 Barkla B.J. & Vera-Estrella R. (2015) Single cell-type comparative metabolomics of epidermal  
509 bladder cells from the halophyte *Mesembryanthemum crystallinum*. *Frontiers in Plant*  
510 *Science* 6.
- 511 Barkla B.J., Vera-Estrella R. & Raymond C. (2016) Single-cell-type quantitative proteomic and  
512 ionomic analysis of epidermal bladder cells from the halophyte model plant  
513 *Mesembryanthemum crystallinum* to identify salt-responsive proteins. *BMC Plant*  
514 *Biology* 16, 110.
- 515 Bates G.W., Rosenthal D.M., Sun J.D., Chattopadhyay M., Peffer E., Yang J., Ort D.R. & Jones  
516 A.M. (2012) A comparative study of the *Arabidopsis thaliana* guard-cell transcriptome  
517 and its modulation by sucrose. *PLoS One* 7.
- 518 Bauer H., Ache P., Lautner S., Fromm J., Hartung W., Al-Rasheid K.A.S., Sonnewald S.,  
519 Sonnewald U., Kneitz S., Lachmann N., Mendel R.R., Bittner F., Hetherington A.M. &  
520 Hedrich R. (2013) The stomatal response to reduced relative humidity requires guard  
521 cell-autonomous ABA synthesis. *Current Biology* 23, 53-57.
- 522 Bolger A.M., Lohse M. & Usadel B. (2014) Trimmomatic: a flexible trimmer for Illumina  
523 sequence data. *Bioinformatics* 30, 2114-2120.
- 524 Borland A.M., Hartwell J., Weston D.J., Schlauch K.A., Tschaplinski T.J., Tuskan G.A., Yang  
525 X.H. & Cushman J.C. (2014) Engineering crassulacean acid metabolism to improve  
526 water-use efficiency. *Trends in Plant Science* 19, 327-338.

- 527 Brillhaus D., Brautigam A., Mettler-Altmann T., Winter K. & Weber A.P. (2016) Reversible  
528 burst of transcriptional changes during induction of crassulacean acid metabolism in  
529 *Talinum triangulare*. *Plant Physiology* 170, 102-122.
- 530 Chiang C.P., Yim W.C., Sun Y.H., Ohnishi M., Mimura T., Cushman J.C. & Yen H.E. (2016)  
531 Identification of ice plant (*Mesembryanthemum crystallinum* L.) microRNAs using RNA-  
532 Seq and their putative roles in high salinity responses in seedlings. *Frontiers in Plant*  
533 *Science* 7, 1143.
- 534 Chu C., Dai Z., Ku M.S. & Edwards G.E. (1990) Induction of crassulacean acid metabolism in  
535 the facultative halophyte *Mesembryanthemum crystallinum* by abscisic acid. *Plant*  
536 *Physiology* 93, 1253-1260.
- 537 Coelho C.P., Huang P., Lee D.Y. & Brutnell T.P. (2018) Making roots, shoots, and seeds: IDD  
538 gene family diversification in plants. *Trends in Plant Science* 23, 66-78.
- 539 Cushman J.C., Tillett R.L., Wood J.A., Branco J.M. & Schlauch K.A. (2008) Large-scale mRNA  
540 expression profiling in the common ice plant, *Mesembryanthemum crystallinum*,  
541 performing C<sub>3</sub> photosynthesis and Crassulacean acid metabolism (CAM). *Journal of*  
542 *Experimental Botany* 59, 1875-1894.
- 543 Davies B.N. & Griffiths H. (2012) Competing carboxylases: circadian and metabolic regulation  
544 of Rubisco in C<sub>3</sub> and CAM *Mesembryanthemum crystallinum* L. *Plant, Cell and*  
545 *Environment* 35, 1211-1220.
- 546 De Rocher E.J., Harkins K.R., Galbraith D.W. & Bohnert H.J. (1990) Developmentally regulated  
547 systemic endopolyploid in succulents with small genomes. *Science* 250, 99-101.



- 548 Ding Y., Liu N., Virlouvet L., Riethoven J.J., Fromm M. & Avramova Z. (2013) Four distinct  
549 types of dehydration stress memory genes in *Arabidopsis thaliana*. *BMC Plant Biol* 13,  
550 229.
- 551 Dittrich P. (1976) Nicotinamide adenine dinucleotide-specific "malic" enzyme in *Kalanchoe*  
552 *daigremontiana* and other plants exhibiting crassulacean acid metabolism. *Plant*  
553 *Physiology* 57, 310-314.
- 554 Dodd A.N., Borland A.M., Haslam R.P., Griffiths H. & Maxwell K. (2002) Crassulacean acid  
555 metabolism: plastic, fantastic. *J Exp Bot* 53, 569-580.
- 556 Doyle J.J. & Doyle J.L. (1987) A rapid DNA isolation from small amount of fresh leaf tissue.  
557 *Phytochemical Bulletin* 19, 11-15.
- 558 Golldack D., Li C., Mohan H. & Probst N. (2014) Tolerance to drought and salt stress in plants:  
559 unraveling the signaling networks. *Frontiers in Plant Science* 5.
- 560 Ha J., Bernard W., Yim W.C., Albion R.L., Schlauch K.A., Yin H. & Cushman J.C. (2014) Draft  
561 genome sequence of the common ice plant (*Mesembryanthemum crystallinum* L.) a  
562 facultative crassulacean acid metabolism (CAM) and halophytic plant model. In: *Plant*  
563 *and Animal Genome XXII Conference*, San Diego, CA.
- 564 Hoagland D. & Arnon D. (1950) The water culture method of growing plants without soil. In:  
565 *California Agricultural Experiment Station Circular* pp. 1-32. College of Agriculture,  
566 University of California, Berkeley, San Francisco, CA.
- 567 Hoang X.L.T., Nhi D.N.H., Thu N.B.A., Thao N.P. & Tran L.S.P. (2017) Transcription factors  
568 and their roles in signal transduction in plants under abiotic stresses. *Current Genomics*  
569 18, 483-497.

- 570 Huang X. & Madan A. (1999) CAP3: A DNA sequence assembly program. *Genome Research* 9,  
571 868-877.
- 572 Hurst A.C., Grams T.E.E. & Ratajczak R. (2004) Effects of salinity, high irradiance, ozone, and  
573 ethylene on mode of photosynthesis, oxidative stress and oxidative damage in the  
574 C<sub>3</sub>/CAM intermediate plant *Mesembryanthemum crystallinum* L. *Plant, Cell and*  
575 *Environment* 27, 187-197.
- 576 Jiao Y., Yang H., Ma L., Sun N., Yu H., Liu T., Gao Y., Gu H., Chen Z., Wada M., Gerstein M.,  
577 Zhao H., Qu L.J. & Deng X.W. (2003) A genome-wide analysis of blue-light regulation  
578 of Arabidopsis transcription factor gene expression during seedling development. *Plant*  
579 *Physiology* 133, 1480-1493.
- 580 Kaushal S.S., Gold A.J. & Mayer P.M. (2017) Land use, climate, and water resources - global  
581 stages of interaction. *Water* 9, 1-10.
- 582 Lee D.M. & Assmann S.M. (1992) tomato responses to light in the facultative crassulacean acid  
583 metabolism species, *Portulacaria afra*. *Physiologia Plantarum* 85, 35-42.
- 584 Leonhardt N., Kwak J.M., Robert N., Waner D., Leonhardt G. & Schroeder J.I. (2004)  
585 Microarray expression analyses of Arabidopsis guard cells and isolation of a recessive  
586 abscisic acid hypersensitive protein phosphatase 2C mutant. *Plant Cell* 16, 596-615.
- 587 Li B. & Dewey C.N. (2011) RSEM: accurate transcript quantification from RNA-Seq data with  
588 or without a reference genome. *BMC Bioinformatics* 12, 323.
- 589 Livak K.J. & Schmittgen T.D. (2001) Analysis of relative gene expression data using real-time  
590 quantitative PCR and the 2(-Delta Delta C(T)) Method. *Methods* 25, 402-408.

- 591 McCarthy D.J., Chen Y. & Smyth G.K. (2012) Differential expression analysis of multifactor  
592 RNA-Seq experiments with respect to biological variation. *Nucleic Acids Res* 40, 4288-  
593 4297.
- 594 Meyer G., Schmitt J.M. & Bohnert H.J. (1990) Direct screening of a small genome: estimation of  
595 the magnitude of plant gene expression changes during adaptation to high salt. *Molecular*  
596 *Genomics and Genetics* 224, 347-356.
- 597 Nobel P. (1996) High productivity of certain agronomic CAM Species. In: *Crassulacean Acid*  
598 *Metabolism. Biochemistry, ecophysiology and evolution* (eds K. Winter & J.A.C. Smith),  
599 pp. 255-265. Springer-Verlag, Berlin.
- 600 Oh D.H., Barkla B.J., Vera-Estrella R., Pantoja O., Lee S.Y., Bohnert H.J. & Dassanayake M.  
601 (2015) Cell type-specific responses to salinity - the epidermal bladder cell transcriptome  
602 of *Mesembryanthemum crystallinum*. *New Phytologist* 207, 627-644.
- 603 Osmond C.B. (1978) Crassulacean acid metabolism: a curiosity in context. *Annual Review of*  
604 *Plant Physiology* 29, 379-414.
- 605 Owen N.A. & Griffiths H. (2013) A system dynamics model integrating physiology and  
606 biochemical regulation predicts extent of crassulacean acid metabolism (CAM) phases.  
607 *New Phytologist* 200, 1116-1131.
- 608 Pandey S., Wang R.S., Wilson L., Li S., Zhao Z.X., Gookin T.E., Assmann S.M. & Albert R.  
609 (2010) Boolean modeling of transcriptome data reveals novel modes of heterotrimeric G-  
610 protein action. *Molecular Systems Biology* 6.
- 611 Savvides A., Fanourakis D. & van Ieperen W. (2012) Coordination of hydraulic and stomatal  
612 conductances across light qualities in cucumber leaves. *Journal of Experimental Botany*  
613 63, 1135-1143.

- 614 Seo P.J. & Park C.M. (2011) Signaling linkage between environmental stress resistance and leaf  
615 senescence in *Arabidopsis*. *Plant Signal Behav* 6, 1564-1566.
- 616 Surowka E., Dziurka M., Kocurek M., Goraj S., Rapacz M. & Miszalski Z. (2016) Effects of  
617 exogenously applied hydrogen peroxide on antioxidant and osmoprotectant profiles and  
618 the C<sub>3</sub>-CAM shift in the halophyte *Mesembryanthemum crystallinum* L. *Journal of Plant*  
619 *Physiology* 200, 102-110.
- 620 Takahashi Y., Ebisu Y., Kinoshita T., Doi M., Okuma E., Murata Y. & Shimazaki K. (2013)  
621 bHLH transcription factors that facilitate K<sup>+</sup> uptake during stomatal opening are  
622 repressed by abscisic acid through phosphorylation. *Science Signaling* 6, ra48.
- 623 Tallman G., Zhu J.X., Mawson B.T., Amodeo G., Nouhi Z., Levy K. & Zeiger E. (1997)  
624 Induction of CAM in *Mesembryanthemum crystallinum* abolishes the stomatal response  
625 to blue light and light-dependent zeaxanthin formation in guard cell chloroplasts. *Plant*  
626 *and Cell Physiology* 38, 236-242.
- 627 Taybi T. & Cushman J.C. (1999) Signaling events leading to crassulacean acid metabolism  
628 induction in the common ice plant. *Plant Physiology* 121, 545-556.
- 629 Tsukagoshi H., Suzuki T., Nishikawa K., Agarie S., Ishiguro S. & Higashiyama T. (2015) RNA-  
630 seq analysis of the response of the halophyte, *Mesembryanthemum crystallinum* (ice plant)  
631 to high salinity. *PLoS One* 10, e0118339.
- 632 Vera-Estrella R., Barkla B.J., Amezcua-Romero J.C. & Pantoja O. (2012) Day/night regulation  
633 of aquaporins during the CAM cycle in *Mesembryanthemum crystallinum*. *Plant, Cell*  
634 *and Environment* 35, 485-501.

- 635 Wang R.S., Pandey S., Li S., Gookin T.E., Zhao Z.X., Albert R. & Assmann S.M. (2011)  
636 Common and unique elements of the ABA-regulated transcriptome of *Arabidopsis* guard  
637 cells. *BMC Genomics* 12.
- 638 Winter K. & Holtum J.A. (2005) The effects of salinity, crassulacean acid metabolism and plant  
639 age on the carbon isotope composition of *Mesembryanthemum crystallinum* L., a  
640 halophytic C<sub>3</sub>-CAM species. *Planta* 222, 201-209.
- 641 Winter K. & Ziegler H. (1992) Induction of crassulacean acid metabolism in  
642 *Mesembryanthemum crystallinum* increases reproductive success under conditions of  
643 drought and salinity stress. *Oecologia* 92, 475-479.
- 644 Yanhui C., Xiaoyuan Y., Kun H., Meihua L., Jigang L., Zhaofeng G., Zhiqiang L., Yunfei Z.,  
645 Xiaoxiao W., Xiaoming Q., Yunping S., Li Z., Xiaohui D., Jingchu L., Xing-Wang D.,  
646 Zhangliang C., Hongya G. & Li-Jia Q. (2006) The MYB transcription factor superfamily  
647 of *Arabidopsis*: expression analysis and phylogenetic comparison with the rice MYB  
648 family. *Plant Mol Biol* 60, 107-124.
- 649 Zhao Z.X., Assmann S.M. (2011) The glycolytic enzyme, phosphoglycerate mutase, has critical  
650 roles in stomatal movement, vegetative growth, and pollen production in *Arabidopsis*  
651 *thaliana*. *J Exp Bot* 62, 5179-5189.
- 652 Zhao Z.X., Zhang W., Stanley B.A. & Assmann S.M. (2008) Functional proteomics of  
653 *Arabidopsis thaliana* guard cells uncovers new stomatal signaling pathways. *Plant Cell*  
654 20, 3210-3226.
- 655 Ziska L., Crimmins A., Auclair A., DeGrasse S., Garofalo J.F., Khan A.S., Loladze I., Pérez de  
656 León A.A., Showler A., Thurston J. & Walls I. (2016) Food safety, nutrition, and  
657 distribution. In: *The Impacts of Climate Change on Human Health in the United States: A*

658            *Scientific Assessment* (eds A. Crimmins, J. Balbus, J.L. Gamble, C.B. Beard, J.E. Bell, D.  
659            Dodgen, R.J. Eisen, N. Fann, M.D. Hawkins, S.C. Herring, L. Jantarasami, D.M. Mills, S.  
660            Saha, M.C. Sarofim, J. Trtanj, & L. Ziska), pp. 189-216. U.S. Global Change Research  
661            Program, Washington, DC.

662

663

664

665

**Table 1** The number of differentially expressed transcripts in comparison of control and salt-treated samples

| Contrast                         | # Contigs <sup>a</sup> | # transcripts differentially expressed between control and salt-treated samples (% <sup>b</sup> ) | # transcripts down-regulated in salt (% <sup>b</sup> ) | # transcripts upregulated in salt (% <sup>b</sup> ) |
|----------------------------------|------------------------|---------------------------------------------------------------------------------------------------|--------------------------------------------------------|-----------------------------------------------------|
| Day 5 control vs. Day 5 salt     | 31,560                 | 64 (0.20)                                                                                         | 35 (0.11)                                              | 29 (0.09)                                           |
| Day 6 control vs. Day 6 salt     | 26,954                 | 65 (0.24)                                                                                         | 37 (0.14)                                              | 28 (0.10)                                           |
| Day 7 control vs. Day 7 salt     | 30,378                 | 91 (0.30)                                                                                         | 26 (0.09)                                              | 65 (0.21)                                           |
| Night 5 control vs. Night 5 salt | 34,367                 | 235 (0.68)                                                                                        | 75 (0.22)                                              | 160 (0.47)                                          |
| Night 6 control vs. Night 6 salt | 29,618                 | 38 (0.13)                                                                                         | 19 (0.06)                                              | 19 (0.06)                                           |
| Night 7 control vs. Night 7 salt | 28,462                 | 81 (0.28)                                                                                         | 37 (0.13)                                              | 44 (0.15)                                           |

<sup>a</sup> shows the number of transcripts have at least one expected transcripts predicted from RSEM (RNA-Seq by Expectation-Maximization)

<sup>b</sup> is calculated by dividing the number of transcripts differentially expressed by the number of transcripts<sup>a</sup>

**Table 2** Functional categorization of selected transcripts differentially expressed in guard cells in response to salt stress. Significant change is expressed as a Log<sub>2</sub> value of fold change of salt/control samples. For the full list of transcripts, please refer to Table S4.

| Transcript ID     | Annotation                                                                  | Log <sub>2</sub> FC | Time point      | Gene function <sup>a</sup> |
|-------------------|-----------------------------------------------------------------------------|---------------------|-----------------|----------------------------|
| Contig12312       | Fructose-bisphosphate aldolase 2 ( <i>FBA2</i> )                            | -5.23               | Night 7         | CAM                        |
| Mcr017048.026     | Phosphoglycerate mutase, 2,3-bisphosphoglycerate-independent ( <i>PGM</i> ) | -7.66, -9.34        | Day 7, Night 5  | CAM                        |
| Contig3509        | β-amylase 5 ( <i>AMYB5</i> )                                                | 2.98                | Day 7           | CAM                        |
| Contig20069       | Carbonic anhydrase 2 ( <i>CAH2</i> )                                        | 9.94                | Day 5           | CAM                        |
| Contig20312       | Phosphoenolpyruvate carboxylase ( <i>PEPC</i> ) family protein              | 3.23                | Night 5         | CAM                        |
| Contig5856        | Phosphoenolpyruvate carboxylase kinase 1 ( <i>PPCK1</i> )                   | 3.64                | Night 7         | CAM                        |
| comp24500_c0_seq1 | Phosphoenolpyruvate carboxylase 1 ( <i>PEPC1</i> )                          | 2.63                | Night 7         | CAM; GC                    |
| comp14048_c0_seq1 | Basic helix-loop-helix (bHLH) DNA-binding superfamily                       | -7.96               | Day 6           | GC; TF                     |
| Mcr002150.001     | NAC domain containing protein 83                                            | -9.76               | Night 5         | GC; TF                     |
| comp13165_c0_seq1 | AGAMOUS-like 8                                                              | 3.34                | Night 7         | TF                         |
| comp21521_c0_seq1 | NAC domain containing protein 17                                            | 4.83                | Night 5         | TF                         |
| Contig16446       | GRAS family transcription factor                                            | -2.91               | Night 5         | TF                         |
| Contig18172       | Duplicated homeodomain-like superfamily protein                             | 3.56                | Night 5         | TF                         |
| Contig20720       | WRKY DNA-binding protein 26                                                 | 4.17, 2.83          | Day 7 & Night 7 | TF                         |
| Contig2750        | DNA-binding bromodomain-containing protein                                  | -8.22               | Day 5           | TF                         |
| Contig5045        | FAR1-related sequence 5                                                     | 4.16                | Night 5         | TF                         |
| Contig7210        | BEL1-like homeodomain 7                                                     | 2.49                | Night 7         | TF                         |
| Contig9771        | Homeobox 7                                                                  | 2.63                | Night 7         | TF                         |
| Mcr003484.001     | Zinc finger (CCCH-type) family protein                                      | 4.74, 5.33          | Day 7 & Night 7 | TF                         |
| Mcr008625.003     | Telomere repeat binding factor 1                                            | 5.08                | Day 6           | TF                         |
| Mcr009671.000     | BES1-interacting MYC-like protein 2                                         | -9.14               | Day 7           | TF                         |
| Mcr010456.002     | Basic helix-loop-helix (bHLH) DNA-binding superfamily protein               | -3.92               | Night 5         | TF                         |
| Mcr010936.001     | Integrase-type DNA-binding superfamily protein                              | 4.63                | Night 5         | TF                         |
| Mcr014957.003     | Basic helix-loop-helix (bHLH) DNA-binding superfamily protein               | 10.40               | Night 5         | TF                         |
| Mcr016258.030     | Squamosa promoter binding protein-like 1                                    | 9.49                | Night 5         | TF                         |

<sup>a</sup> shows transcripts involved in either CAM mode, expressed in guard cell (GC), or transcription factor (TF)



## Figure Legends

**Figure 1.** Leaf titratable acidity and morphological phenotype of *Mesembryanthemum crystallinum* under control and 500 mM NaCl treatment conditions. Four-week old plants were subjected to control (water) and 500 mM NaCl treatment for 4 to 28 days. **(A)** Measurement of leaf acidity was made at the start (8 am) of the photoperiod. Each bar represents mean of four replicates  $\pm$  standard error (SE). Asterisks indicate statistical difference at  $p$ -value  $< 0.05$  between the control and salt-treated plants as determined by  $t$ -tests. At the 7<sup>th</sup> day, the  $p$ -value is 0.0062. **(B)** Images of control and 7-day salt-treated plants.

**Figure 2.** Day/night profiles of leaf net CO<sub>2</sub> exchange and stomatal aperture in leaves of *M. crystallinum* grown under control (4-week old + 5 to 7 days with water) and salt treatment conditions (4-week old + 5 to 7 days with 500 mM NaCl). **(A)** Net CO<sub>2</sub> exchange. The dark bars on the x-axis represent dark periods and each gas exchange profile is the average of three biological replicates. Day 28 CAM plants were included as positive controls. **(B)** Stomatal aperture of control and salt-treated plants. Data are mean  $\pm$  SE of three independent experiments, each with 60 – 80 stomata for a total of at least 180 stomata. Asterisks indicate statistical difference at  $p$ -value  $< 0.05$ .

**Figure 3.** Expression profiles of CAM marker genes and PEPC activities during the C<sub>3</sub> to CAM transition at 2 am and 4 am. **(A)** Transcript levels of *PEPC*, *PPCK*, *CCAI*, *GTF1*, *ABII* and *PGK3* were determined by qRT-PCR. Error bars show the SE ( $n \geq 3$ ). Asterisks indicate a significant difference between control and salt-treated plants (Student's  $t$ -test;  $p$ -value  $< 0.05$ ). **(B)**

PEPC enzyme activities were measured in three biological replicates. Bars represent standard deviation (SD) of the means. Two-way ANOVA and Tukey's test were used for the PEPC activity analysis between different time points and different treated plants. Day 28 CAM plants were used as positive controls.

**Figure 4.** “Biological Process” functional Gene Ontology (GO) term classifications of DEGs. Please refer to Table S4 for detailed information of the DEGs.

**Figure 5.** Overlap of DEGs identified at different time points. (A) Overlap of DEGs from different day time points. (B) Overlap of DEGs from different night time points. (C) Overlap of DEGs from day and night.

**Figure 6.** Clustering analysis of transcripts differentially expressed in guard cells of the C<sub>3</sub> to CAM transition plants. *k*-means clustering algorithm (*k* = 8) were used. *n* indicates the number of transcripts in each cluster.

### Supporting Information

**Table S1.** List of primers used in this study.

**Table S2.** Expression analysis of CAM-related, circadian-related and guard cell signaling related genes in leaf samples using real-time RT-PCR.

**Table S3.** List of genes showing reversed expression patterns under control versus salt stress conditions in the guard cell RNA-seq dataset. The expression difference is expressed as log 2 value of fold change between day and night. Cells with "light orange" and "light blue" colors represent up-regulated in day and night samples at adjusted p-value < 0.05, respectively

**Table S4.** Functional categorization of 495 transcripts significantly differentially expressed in guard cells in response to salt stress. Significant change is expressed as a Log 2 value of fold change of salt/control samples.

**Figure S1.** Stomatal aperture in leaves of C<sub>3</sub> (4-week + 21-day water control) and CAM mode ice plants (4-week + 21-day salt treatment) under light and dark conditions. **(A)** Representative images showing stomatal aperture; **(B)** Stomatal aperture in leaves of C<sub>3</sub> and CAM plants under light and dark. Data are mean ± SE of three independent experiments ( $n = 3$ ) with 60 – 80 stomata for each replicate (i.e., a total of at least 180 stomata for each experiment). Two-way ANOVA and Tukey's test were used for stomatal aperture analysis between the C<sub>3</sub> and CAM plants. For the images and stomatal aperture measurement, the epidermal peels were directly obtained from the plants, followed measuring the width and length of the stomata under microscope.

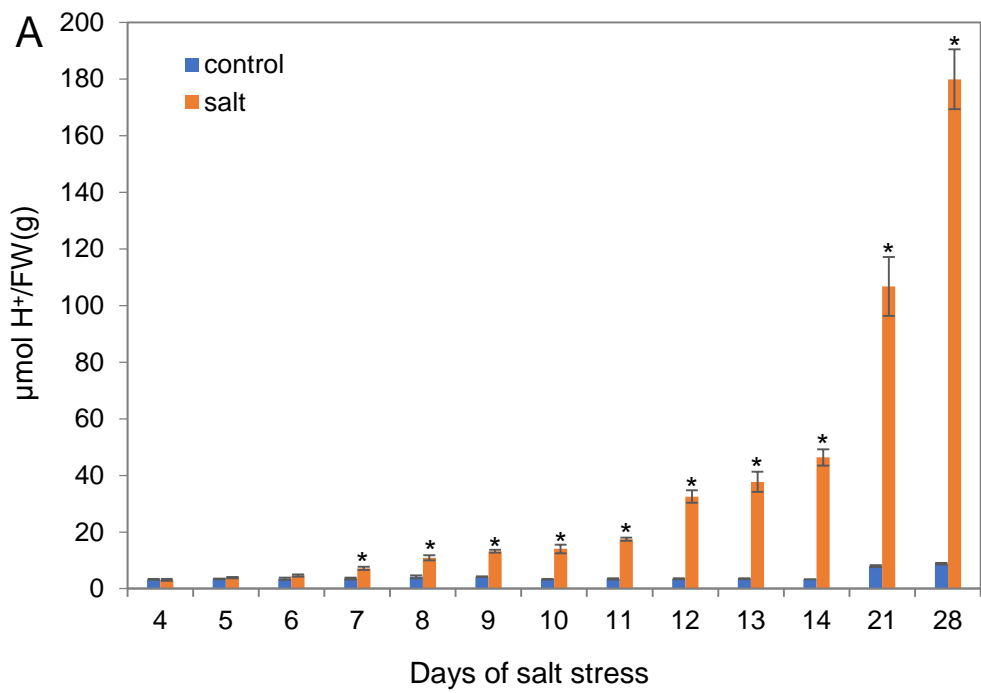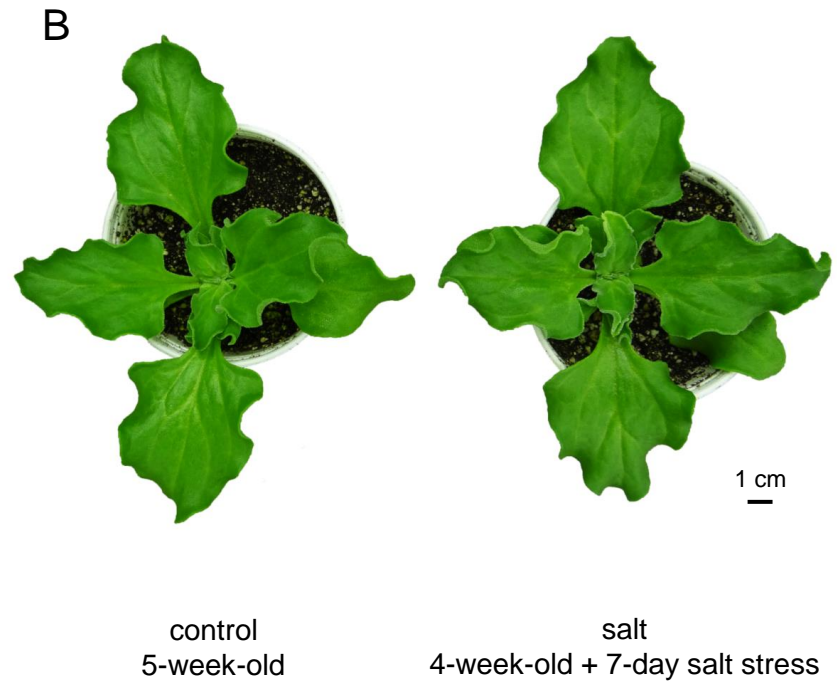

Figure 1

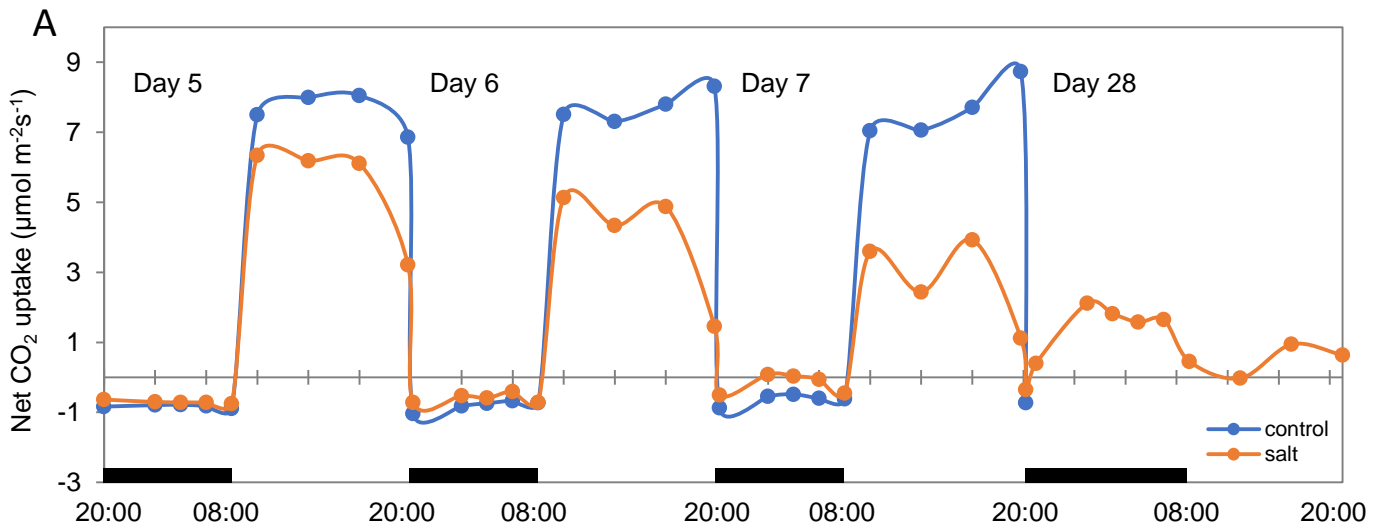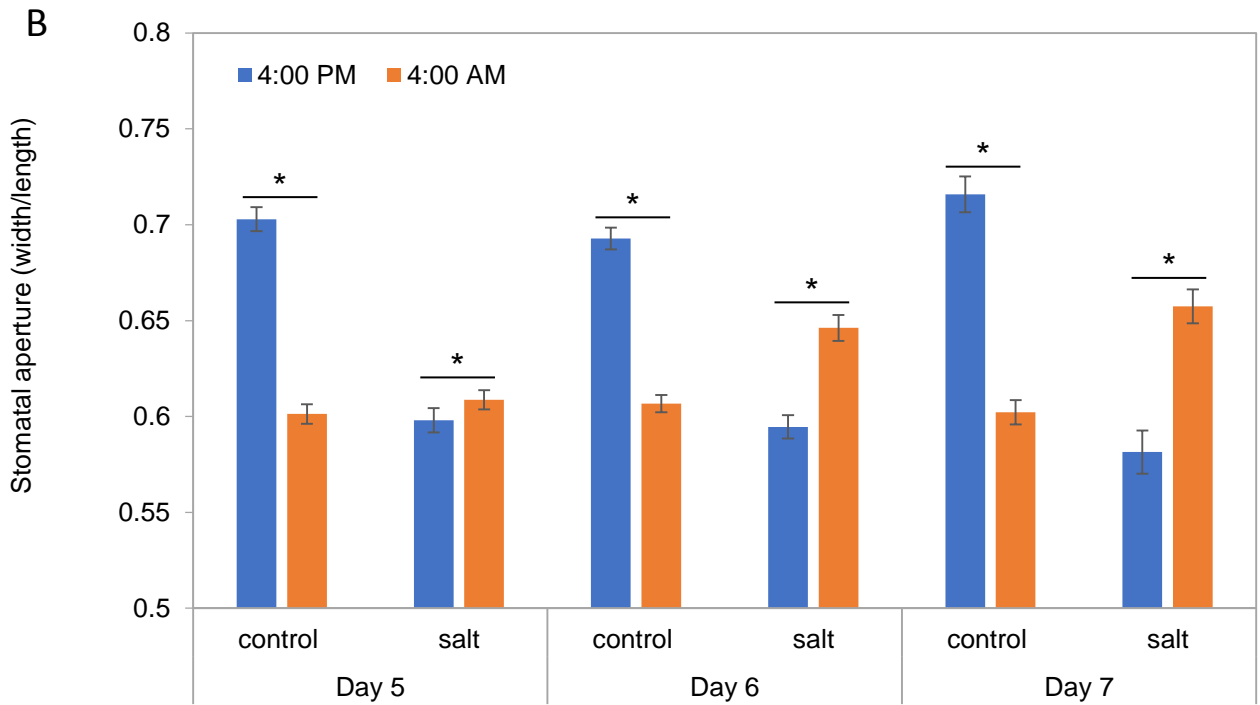

Figure 2

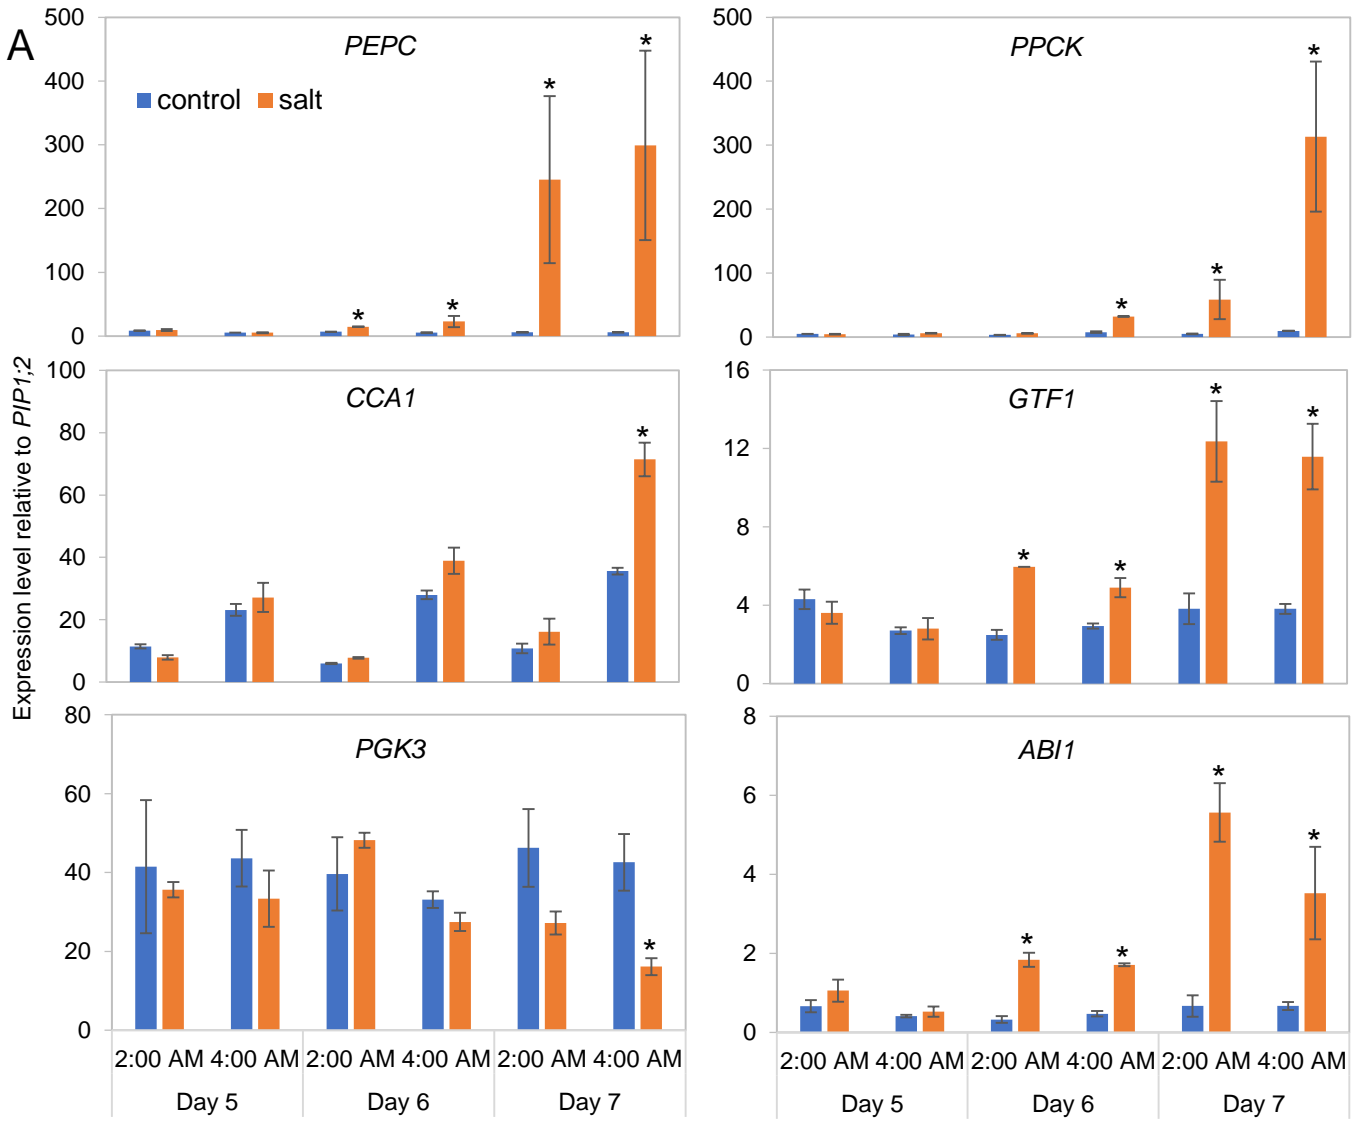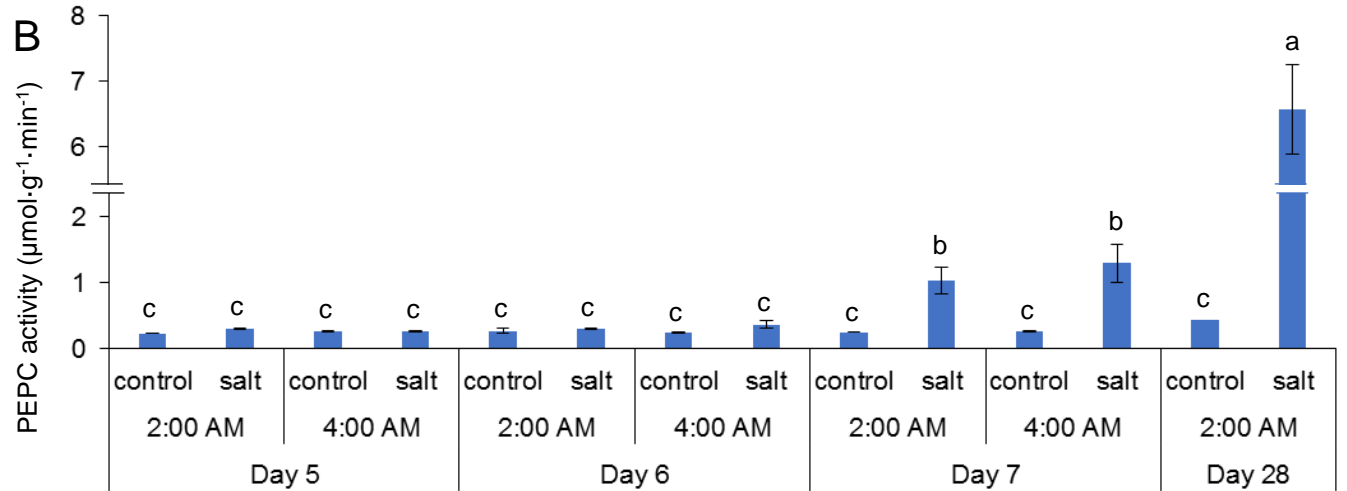

Figure 3

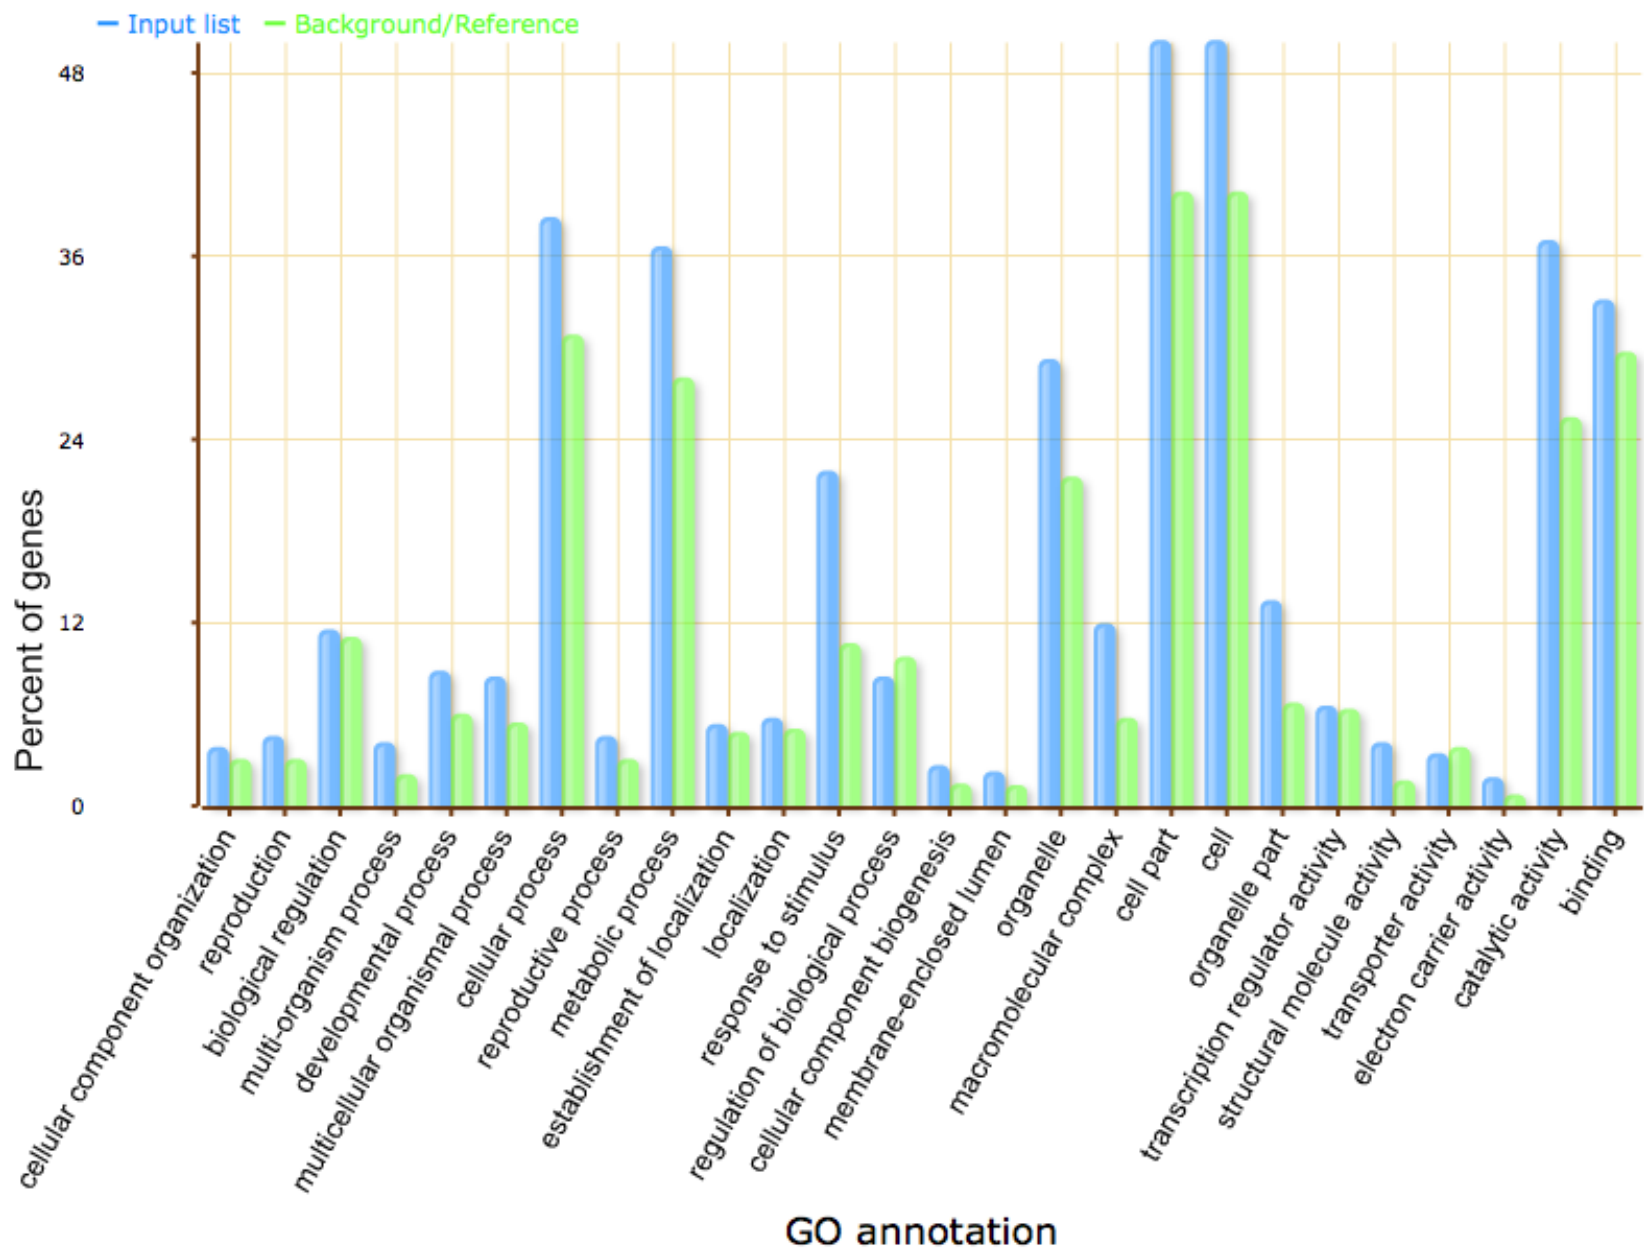

Figure 4

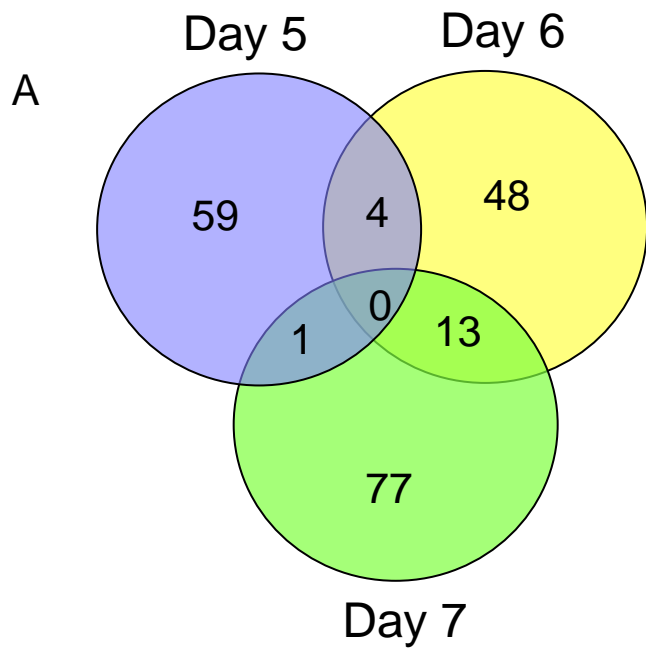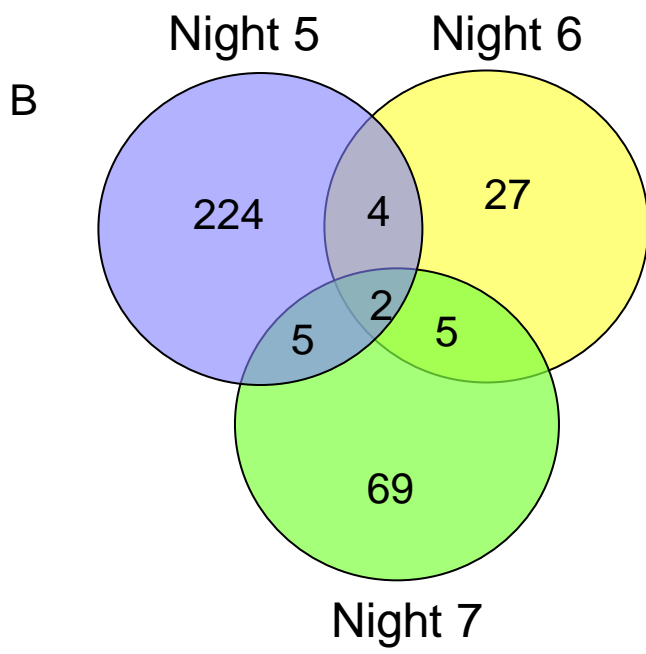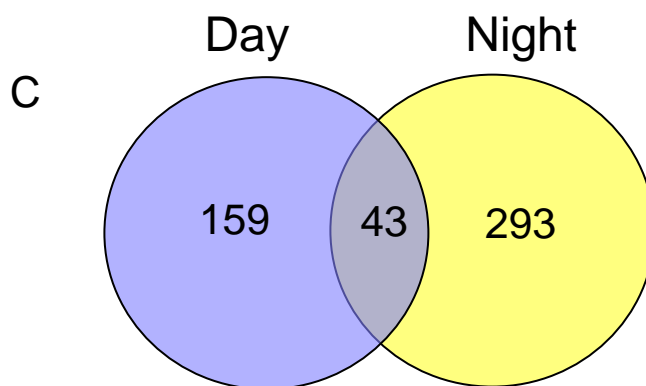

Figure 5



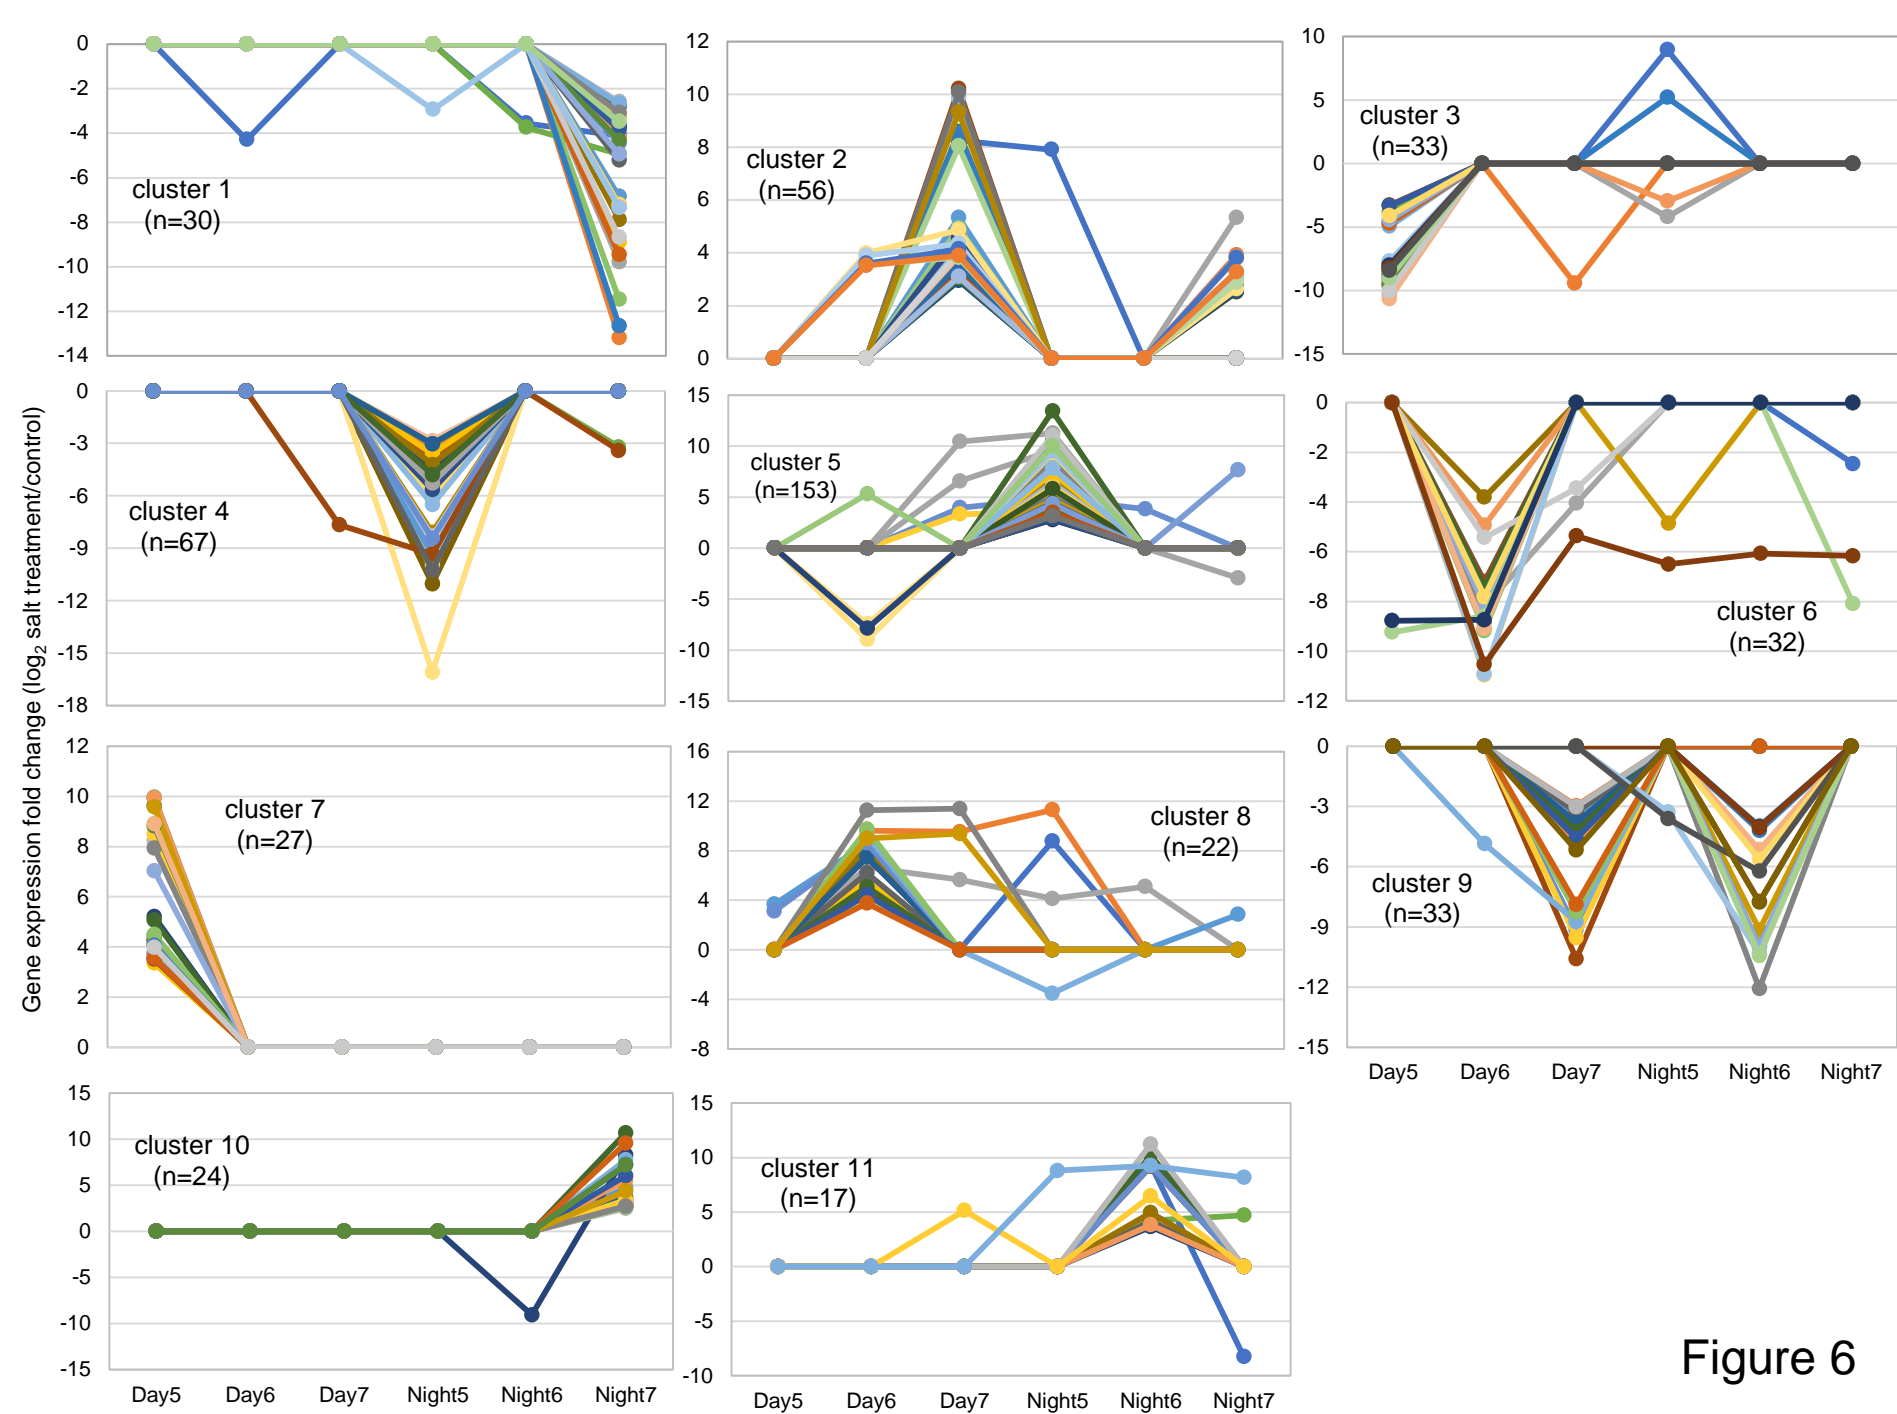

Figure 6
